# Supplementary material
Source: Springer Nature journal article supplement (https://www.springermedizin.de/resource/supplementary/12990_2005_16_MOESM1_ESM.pdf/9612160)
Supplement: MOESM1 [file 9612160]

# TRPM8

Natural  
Ligands:

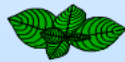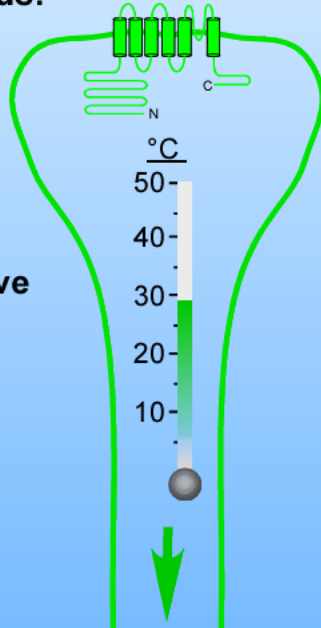

Thermosensitive  
Afferents

Sensations:

Cool  
*Noxious Cold?*

# TRPA1 + TRPV1

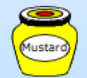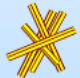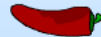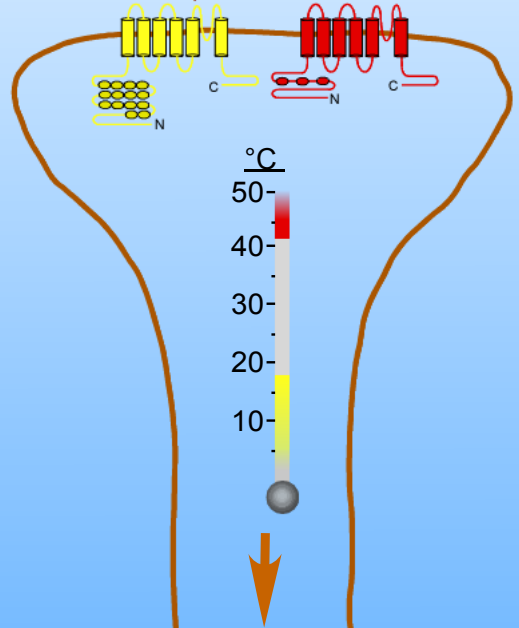

Noxious Heat  
Pungency  
*Noxious Cold?*
